# Supplementary material
Source: MDPI journal article supplement (https://www.mdpi.com/2079-6439/11/12/110)
Supplement: s1 [file s1]

# Supplementary Document

## Development of Activated Carbon Textiles Produced From Jute and Cotton Wastes for Electromagnetic Shielding Applications

Sema Sert <sup>1</sup>, Deniz Duran Kaya <sup>2</sup> and Ayşegül Körlü <sup>2,\*</sup>

### S.1. Novelty Search

The novelty search was conducted in the Web of Science database on 04.11.2023 using the Boolean operators AND and OR in “all fields” (“microwave” AND “carbonization OR pyrolysis” AND Textile). A total of 36 documents were found. None of these documents were relevant to this study. The documents matching "textile" pertain to textile dyeing sludge, and those matching “microwave” pertain to microwave absorption (not heating). There are two similar studies about “self-purging” (Table S1).

**Table S1.** Studies with similarities and differences relative to this study and the originality of this study.

|     | Similar Study                                                                  | This Study                                                                                                                                      |
|-----|--------------------------------------------------------------------------------|-------------------------------------------------------------------------------------------------------------------------------------------------|
| [1] | PRECURSOR: Dried oil-palm shell (OPS)                                          | PRECURSOR: Wet nonwoven-woven manufactured from jute-cotton wastes                                                                              |
|     | REACTOR: 1 cm-thick porcelain                                                  | REACTOR: 3 mm-thick porcelain                                                                                                                   |
|     | SEALING: Casting plaster - brittle                                             | SEALING: High-temperature Teflon (PTFE) – F=flexible                                                                                            |
|     | PURGING: Self-purging (no inert gas)                                           | PURGING: Self-urging (no inert gas)                                                                                                             |
|     | MICROWAVE HEATING: Under constant power (900 W) for 20 minutes                 | MICROWAVE HEATING: Slowly increasing power: 120 W (10 min.) + 350 W (15 min.) + 460 W (15 min.) + 600 W (40 min.) + 700 W (10 min.) = 1.5 hours |
|     | FINAL PRODUCT: Powder biochar                                                  | FINAL PRODUCT: Activated carbon textile                                                                                                         |
| [2] | PRECURSOR: Nonwoven manufactured from acrylic fibrous waste, 11.6 mm thickness | PRECURSOR: Wet nonwoven-woven manufactured from jute-cotton wastes The final average thickness is approximately 2.5 mm.                         |
|     | UNDER CHARCOAL                                                                 | UNDER HEMP DECORTICATION WASTE                                                                                                                  |
|     | PURGING: Self-purging (no inert gas)                                           | PURGING: Self-purging (no inert gas)                                                                                                            |
|     | HEATING: Traditional muffle furnace for approximately 10 hours                 | MICROWAVE HEATING: Slowly increasing power: 120 W (10 min.) + 350 W (15 min.) + 460 W (15 min.) + 600 W (40 min.) + 700 W (10 min.) = 1.5 hours |
|     | FINAL PRODUCT: Activated carbon                                                |                                                                                                                                                 |
|     | TEXTILE STRUCTURE                                                              |                                                                                                                                                 |

## S.2. Raman Analysis

The ratio of the peak intensity of the D band to the G band, ID/IGm depends on the excitation energy. ID/IG can be related linearly to the inverse of the crystallite size along the basal plane  $L_a$ , per the equation developed by Tuinstra and Koenig (S1). In 1970, Tuinstra and Koenig found that the proportionality of  $ID/IG \propto L_a^{-1}$  was valid for  $L_a > 2$  nm (Equation S.1). The relationship developed by Ferrari and Robertson,  $ID/IG \propto L_a^{-2}$ , is used for  $L_a < 2$  nm (Equation S.2) [3].

$$L_a(nm) = \frac{560}{E^4} \left( \frac{I_D}{I_G} \right)^{-1} = (2.4 \times 10^{-10}) \lambda^4 \left( \frac{I_D}{I_G} \right)^{-1} \quad (\text{For } L_a > 2) \quad \text{Eq. (S1)}$$

$$L_a(nm) = \sqrt[2]{\left( \frac{I_D}{I_G} \right) ((2.4 \times 10^{-10}) \lambda^4)^{-1}} \quad (\text{For } L_a < 2) \quad \text{Eq. (S2)}$$

**Table S2.** Raman analysis of activated carbon fabrics.

| Textile Sample                                 | D    | G    | ID      | IG      | ID/IG | $L_a$ (nm) | FWHM (cm <sup>-1</sup> ) |        |
|------------------------------------------------|------|------|---------|---------|-------|------------|--------------------------|--------|
|                                                |      |      |         |         |       |            | D                        | G      |
| WATER                                          | 1367 | 1586 | 5101.24 | 5949.68 | 0.86  | 0.21       | 226.47                   | 103.75 |
| WATER<br>Microwave                             | 1348 | 1582 | 1675.00 | 1586.00 | 1.06  | 0.23       | 191.89                   | 96.91  |
| 2% H <sub>2</sub> SO <sub>4</sub>              | 1369 | 1583 | 4236.58 | 5204.24 | 0.81  | 0.21       | 222.89                   | 103.30 |
| 2% H <sub>2</sub> SO <sub>4</sub><br>Microwave | 1352 | 1585 | 6202.61 | 7352.41 | 0.84  | 0.21       | 187.43                   | 88.26  |
| 4% H <sub>2</sub> SO <sub>4</sub>              | 1366 | 1584 | 3869.18 | 4982.3  | 0.78  | 0.20       | 129.01                   | 88.82  |
| 4% H <sub>2</sub> SO <sub>4</sub><br>Microwave | 1363 | 1585 | 4980.72 | 5893.47 | 0.85  | 0.21       | 100.79                   | 82.76  |
| 8% H <sub>2</sub> SO <sub>4</sub>              | 1366 | 1586 | 3217.54 | 4125.14 | 0.78  | 0.20       | 117.30                   | 84.37  |
| 8% H <sub>2</sub> SO <sub>4</sub><br>Microwave | 1348 | 1585 | 3669.00 | 3875.00 | 0.95  | 0.22       | 98.11                    | 81.86  |

### S.3. XRD Analysis

The size and lattice parameters of the crystal structure can be estimated through the following equations (S.3-4-5):

$$d = \frac{\lambda}{2\sin\theta_{(002)}} \quad \text{Bragg's Law} \quad \text{Eq. (S3)}$$

$$L_a = \frac{1,84\lambda}{\beta\cos\theta_{(100)}} \quad \text{Scherrer Equation} \quad \text{Eq. (S4)}$$

$$L_c = \frac{0,94\lambda}{\beta\cos\theta_{(002)}} \quad \text{Scherrer Equation} \quad \text{Eq. (S5)}$$

where d indicates the size of the crystal,  $\lambda$  represents XRD wavelength Cu K $\alpha$  ( $\lambda = 0,15406$  nm), and  $L_a$ ,  $L_c$  are crystal stacking width and crystal stacking height, respectively. B indicates full width at half maximum (FWHM) measured in radians, and  $\theta$  is the diffraction angle. The “Gaussian peak fitting” method was used to separate the various peaks.

**Table S3.** XRD data analysis.

|                                   | (002)  |        | Crystal Size |         |
|-----------------------------------|--------|--------|--------------|---------|
|                                   | 2Theta | FWHM   | $L_c$ (nm)   | d (002) |
| 2% H <sub>2</sub> SO <sub>4</sub> | 20,57  | 17,480 | 0,482        | 0,431   |
| 4% H <sub>2</sub> SO <sub>4</sub> | 20,24  | 14,793 | 0,570        | 0,438   |
| 8% H <sub>2</sub> SO <sub>4</sub> | 19,37  | 17,432 | 0,483        | 0,458   |

### S.4. TGA Analysis

According to the TGA-DTG analysis (Figure S1) of the five-layer nonwoven made of cotton and jute fibers, there is an initial weight loss of 7.206%, which can be attributed to the removal of moisture from the cotton and jute fibers below 150°C. The fabric began to degrade at 335.74°C, with the greatest weight loss at 355.31°C. This weight loss can be attributed to the decomposition of cotton ( $\alpha$ -cellulose) and jute (lignin) fibers. This finding is compatible with results in the literature [4,5]. The point at which thermal stability begins is 372.56°C. A residue of 5.862% was obtained at the end of the process.

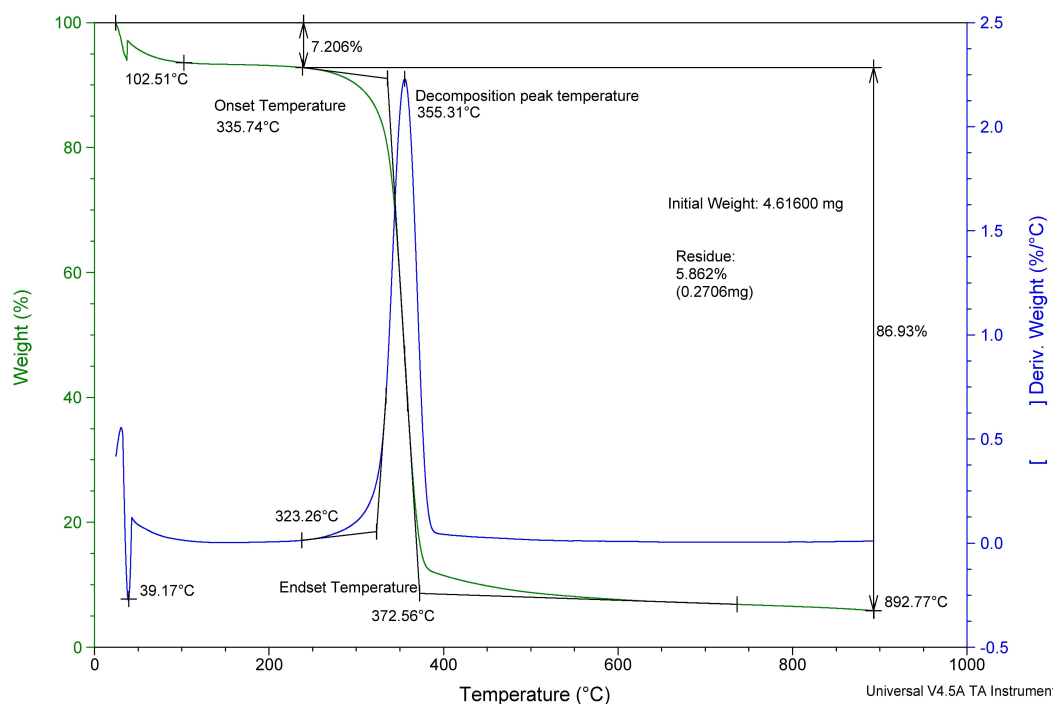

**Figure S1.** TGA-DTG analysis of a five-layer nonwoven fabric consisting of waste cotton and jute fibers.

The point at which thermal stability begins for the product carbonized with 8% acid is 673.45°C. A residue of 48.76% was obtained at the end of the process. A broad and wide TGA curve indicates the presence of impurities in the material (such as volatile, oily, tar-like materials adhering to the surface) that decompose at different temperatures. Small peaks around 420°C also support this conclusion (Figure S2).

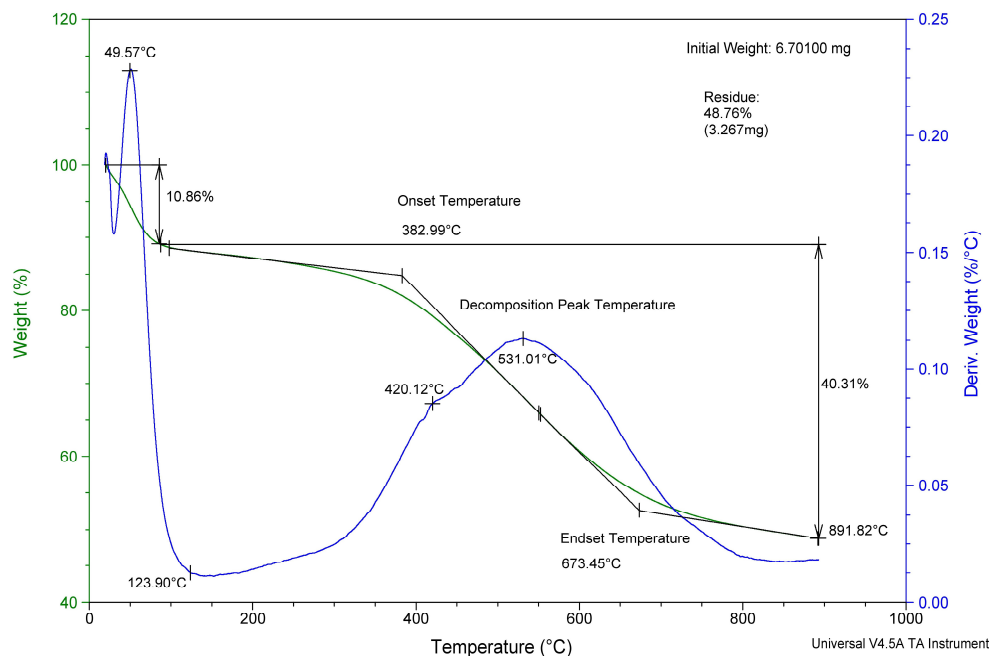

**Figure S2.** TGA-DTG analysis of activated carbon textile obtained with 8% acid.

According to the TGA-DTG analysis (Figure S3) of the microwave-post treated carbonized textile manufactured with 8% acid, there is an initial weight loss of 7.956% below 150°C, which can be attributed to the elimination of moisture and some small-molecule volatiles. The material decomposed at 434.77°C, and the largest weight loss occurred at 585.55°C. The point at which thermal stability begins is 697.96°C. At the end of the process, a residue of 62.70% was obtained. A broad and wide TGA curve indicates that there may be impurities (such as volatile, oily, tar-like materials adhering to the surface) that persist despite microwave treatment and that decompose at different temperatures (Figure S3).

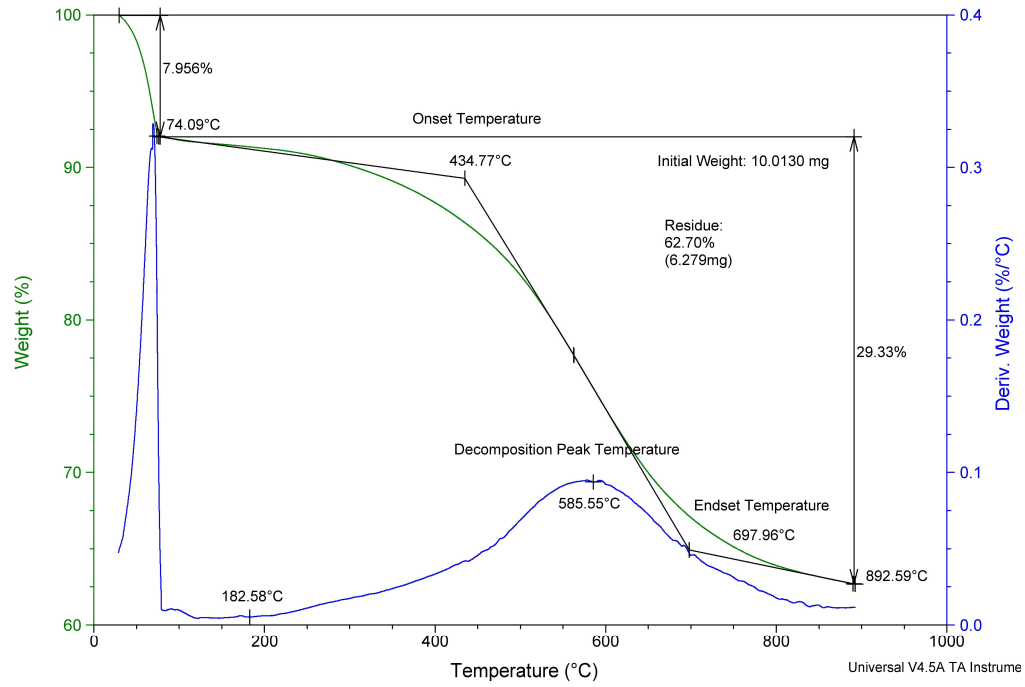

**Figure S3.** TGA-DTG analysis of microwave post-treated activated carbon textile manufactured with 8% acid.

## S.5. Electromagnetic Shielding Efficiency

The electromagnetic shielding effectiveness (EMSE) is the ratio of electromagnetic energy before the shield to energy after the shield and can be expressed as Eq. S7:

$$SE = 10 \log \left( \frac{P_{input}}{P_{output}} \right) \quad \text{Eq. (S6)}$$

where  $P_i$  is the power of the incoming EM wave, and  $P_o$  is the power of the outgoing (returning) EM wave. The unit of SE is measured in decibels (dB).

$$SSE = EMI \text{ SE} / \text{density} \text{ (dB cm}^3 \text{ g}^{-1}) \quad \text{Eq. (S7)}$$

$$SSE/t = SSE / \text{thickness} \text{ (dB cm}^2 \text{ g}^{-1}) \quad \text{Eq. (S8)}$$

$$\% \text{ EMSE} = 100 - \left( \frac{1}{100^{\frac{SE}{10}}} \right) \times 100 \quad \text{Eq. (S9)}$$

## REFERENCES

1. Kong, S.H.; Lam, S.S.; Yek, P.N.Y.; Liew, R.K.; Ma, N.L.; Osman, M.S.; Wong, C.C. Self-Purging Microwave Pyrolysis: An Innovative Approach to Convert Oil Palm Shell into Carbon-Rich Biochar for Methylene Blue Adsorption. *J. Chem. Technol. Biotechnol.* **2019**, *94*, 1397–1405, doi:10.1002/jctb.5884.
2. Naeem, S.; Baheti, V.; Tunakova, V.; Militky, J.; Karthik, D.; Tomkova, B. Development of Porous and Electrically Conductive Activated Carbon Web for Effective EMI Shielding Applications. *Carbon N. Y.* **2017**, *111*, 439–447, doi:10.1016/j.carbon.2016.10.026.
3. Schuepfer, D.B.; Badaczewski, F.; Guerra-Castro, J.M.; Hofmann, D.M.; Heiliger, C.; Smarsly, B.; Klar, P.J. Assessing the Structural Properties of Graphitic and Non-Graphitic Carbons by Raman Spectroscopy. *Carbon N. Y.* **2020**, *161*, 359–372, doi:10.1016/j.carbon.2019.12.094.
4. Shahedifar, V.; Rezadoust, A.M. Thermal and Mechanical Behavior of Cotton/Vinyl Ester Composites: Effects of Some Flame Retardants and Fiber Treatment. *J. Reinf. Plast. Compos.* **2013**, *32*, 681–688, doi:10.1177/0731684413475911.
5. Thakur, M.; Sharma, A.; Ahlawat, V.; Bhattacharya, M.; Goswami, S. Process Optimization for the Production of Cellulose Nanocrystals from Rice Straw Derived  $\alpha$ -Cellulose. *Mater. Sci. Energy Technol.* **2020**, *3*, 328–334, doi:10.1016/j.mset.2019.12.005.
